# Supplementary material for: Complete Genome Sequence of Sporisorium scitamineum and Biotrophic Interaction Transcriptome with Sugarcane
Source: PLOS journal article supplement (doi:10.1371/journal.pone.0129318), 2015-06-12
Supplement: S7 (10.1371/journal.pone.0129318.s007) [file journal.pone.0129318.s007]

## S7 – Gene Ontology analysis of *S. scitamineum*

### A GO Biological Process

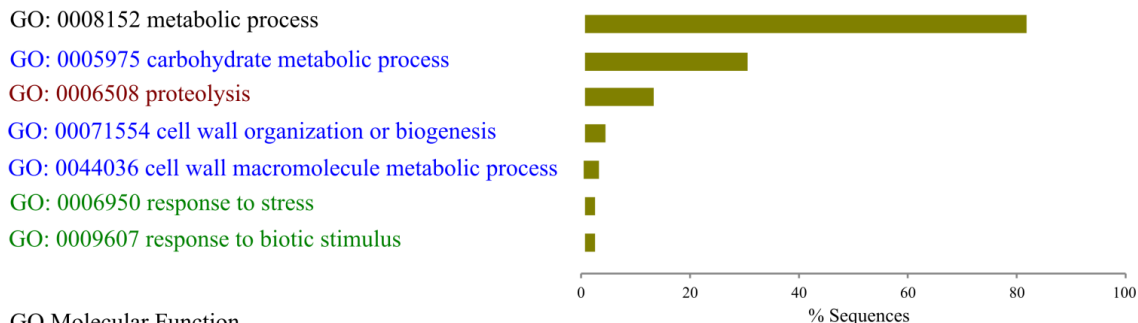

### B GO Molecular Function

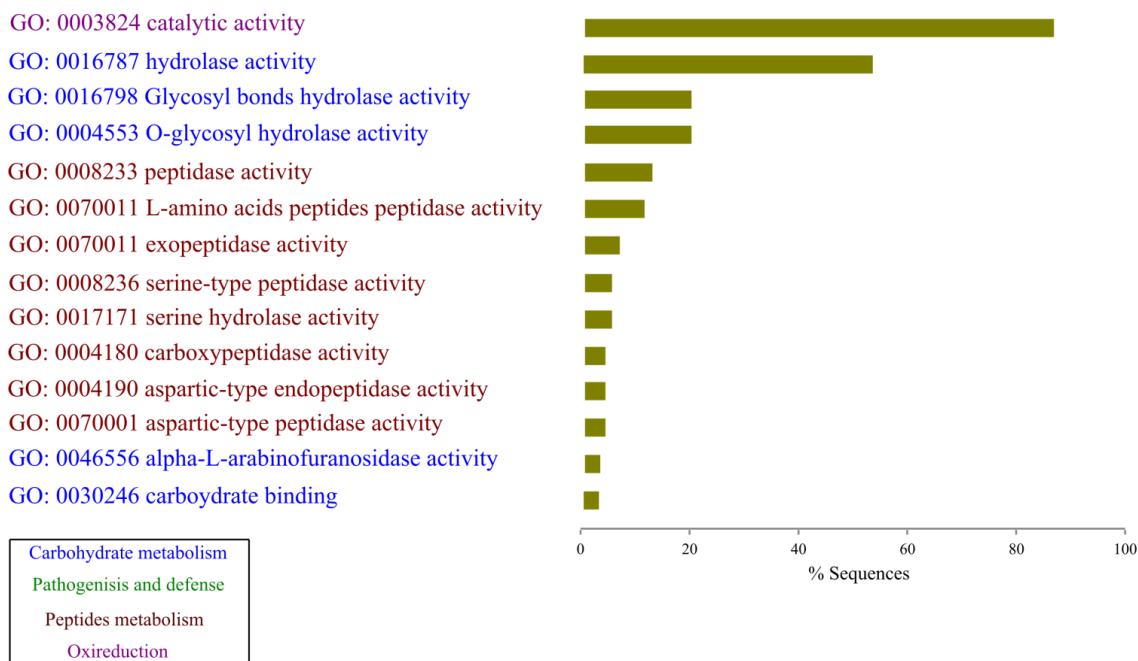

**Figure A.** Gene Ontologies enriched in the *S. scitamineum* secretome. (A) Biological process and (B) Molecular Function. Graphs represents the percentage of sequences in each GO term enriched in the *S. scitamineum* secretome (number of proteins with annotation/total number proteins).
